# Supplementary material for: Phagophores are formed from multilamellar organelles which originate from the outer mitochondrial membrane following mitochondrial fusion
Source: Research Square preprint supplement (doi:10.21203/rs.3.rs-6857499/v1), 2025-06-27
Supplement: Supplementary file 1 [file 0b8903c03d310aad2d854afa.docx]

**Document S1.** Extended Figure 1 legend.

**Figure 1. Cell alterations induced by the amino acid starvation.**

(A-D) Double immunofluorescence labelling of MannII (red) and LC3/p62 (green) in control and starved cells. (A) In control HeLa cells only a few LC3-positive dots are visible. The GC (Man-II; red) was not fragmented. (B) In starved cells LC3-positive dots (green) were accumulated. The GC started to fragment. (C) Control cells exhibited rarep62-positive dots (green) with a solid GC (red). (D) Starved cells showed moreLC3-positive (red) dots than p62-positive (green) dots. (E) Sec bodies-positive for Sec13 (nano-gold) were inside the IAV (left) or surrounded by phagophores (see Figure S1A, B). (F) Branched elongated mitochondria with irregular shape in starved cells. (G) Number of LC3-positive dots. Experimental bars 2, 4, 6, 8 are significantly (p<0.05) higher than their corresponding control bars (1, 3, 5, 7). (H) The number of p62-positive dots. Experimental bars 2, 4, 6, 8 are significantly (p<0.05) higher than their corresponding control bars (1, 3, 5, 7). (I) The number of DAV per a cell is significantly higher after starvation (second bar) compared to control cells (first bar, p<0.05). Control microinjection (third bar) did not induce formation of DAVs (the third bar does not differ from the first one). Following control microinjection and starvation of microinjected cells (fourth bar) the number of DAV significantly increased. In starved cells lacking Sar1A et B the number of DAVs was higher than in cells transfected with control oligos (the fifth and sixth bars, [p<0.05]). COPII inhibitors did not affect DAVs accumulation during starvation (the 7-9th bars are significantly (p<0.05) higher than the second bar). Similarly, lipid inhibitors did not affect DAVs accumulation (the 11th bar is significantly (p<0.05) higher than the second bar). (J) In SNAP29-deficient cells after starvation (siCTR+ST), the mean number of DAVs is significantly (p<0.05) higher than in control cells (siCTR). Elimination of SNAP29 (with or without starvation) did not induce DAVs accumulation (compare N1, N2 and N3 bars). In heterokaryon formed after fusion between the SNAP29 KD cells subjected to starvation and normal cells (the bar N5), DAVs numbers increased significantly (p<0.05; see the last bar). (K) Total cell membrane surface area remains unchanged after starvation alone or with lipid inhibitor (L) Cell volume was also unaffected by starvation or with lipid inhibitor. (M) Total ER surface area did not vary with starvation, COPII or lipid inhibitors, or in SNAP29 or STX17-deficient cells. (N) The ratio of IMM to OMM surface decreased with starvation alone (fourth bar), mitochondrial fusion inhibitor (second bar) and in cells lacking SNAP29 or STX17 (sixth and eighth bars). Eliminating SNAP209 or STX17 did not affect significantly this ratio (the 5th and 7th bars). Inhibitor of fission also had no effect significantly impact (third bar). (O, P) Cells transfected with YFP-MITO-cb5TM (green). (O) Non-starved control cells show no co-localization. between round green spot and dots-positive for LC3 (red) in the enlargements (green, red and merged images) of the blue box in (O). (P) The starved cells display co-localization between round green spot and dots-positive for LC3 (red) in the enlargements (green, red and merged images) of the dashed yellow box. (Q-S) Effect of inhibitors of mitochondria fusion (R) and fission (S) by Tomm20 immunolabeling. (Q) Control cells. (R) Cells with the fusion inhibitor (6h) show shorter mitochondria. (S) Cells with fission inhibitor (6h) show longer mitochondria (T). Surface area of IMM was similar in control (CTR) and starved (ST) cells. (U) Control HeLa cell labelled for LC3 (green) shows few LC3-positive dots. (V) Starved cells labelled for Man II (red) and LC3 (green) exhibit accumulation of LC3-positive dots. (W, X) Starved cells microinjected with the αSNAP mutant + TRITC (red cell). (X) LC3–positive spots are visible in injected and non-injected cells. Red color was eliminated. (Y) Accumulation of COPI vesicles and IAV after microinjection with aSNAP mutant. Accumulation of COPI vesicles (round profiles) and IAV (red arrow). (Z) HeLa cell microinjected with anti NSF antibody and starved. Accumulation of COPI vesicles (black arrows) and IAV (red box). White arrows indicate microinjected gold particles. (Z1) MLO in starved cell. (Z2) Surface area of IAVs significantly increases after starvation and microinjection of NSF antibodies or αSNAP mutant. (Z3) Enlargement of the red box. Protrusion of the outer membrane of IAV. Scale bars: 5 µm (A-D, O, P); 15 µm (Q, R, S); 10 µm (U-X); 300 nm (Y); 175 nm (Z); 150 nm (Z1, Z3).
